# Supplementary material for: Complete hydrogen release from aqueous ammonia-borane over a platinum-loaded titanium dioxide photocatalyst
Source: Royal Society of Chemistry journal article supplement (doi:10.1039/c5cc06639e), 2015-01-01
Supplement: c5cc06639e1.pdf [file c5cc06639e1.pdf]

## Supplementary Information

### Complete Hydrogen Release from Aqueous Ammonia-borane over Platinum-Loaded Titanium Dioxide Photocatalyst

Takashi Kamegawa<sup>\*,a</sup> and Takayuki Nakaue<sup>a,b</sup>

<sup>a</sup> *Nanoscience and Nanotechnology Research Center, Osaka Prefecture University,  
1-2 Gakuencho, Nakaku, Sakai, Osaka 599-8570, Japan.*

<sup>b</sup> *Department of Applied Chemistry, Graduate School of Engineering,  
Osaka Prefecture University, 1-1 Gakuencho, Nakaku, Sakai, Osaka 599-8531, Japan.*

*E-mail: t-kamegawa@21c.osakafu-u.ac.jp*

**Material.** Ammonia-borane ( $\text{NH}_3\text{BH}_3$ , AB) was obtained from Sigma-Aldrich Co. Hydrogen hexachloroplatinate (IV) hexahydrate ( $\text{H}_2\text{PtCl}_6 \cdot 6\text{H}_2\text{O}$ ), aqueous ammonia solution (5 mmol/l), ammonium sulfate ( $(\text{NH}_4)_2\text{SO}_4$ ), and methanol were purchased from Nacalai Tesque Inc. Boron trioxide ( $\text{B}_2\text{O}_3$ ) was obtained from Kishida Chemical Co. Ltd. All chemicals were used without further purification.

**Sample preparation.** The different types of  $\text{TiO}_2$  such as JRC-TiO-3 (crystalline phase: rutile (R), Surface area:  $51 \text{ m}^2/\text{g}$ ), JRC-TiO-4 (anatase/rutile (A/R),  $50 \pm 15 \text{ m}^2/\text{g}$ ) and JRC-TiO-8 (anatase (A),  $338 \text{ m}^2/\text{g}$ ) were supplied from the Catalysis Society of Japan as a reference catalyst. The photo-deposition of Pt nanoparticles on each  $\text{TiO}_2$  was conducted using a de-aerated aqueous methanol solution of  $\text{H}_2\text{PtCl}_6 \cdot 6\text{H}_2\text{O}$  under UV light irradiation ( $\lambda > 290 \text{ nm}$ ). Samples were denoted as  $\text{Pt}/\text{TiO}_2(\text{R})$ ,  $\text{Pt}/\text{TiO}_2(\text{A/R})$  and  $\text{Pt}/\text{TiO}_2(\text{A})$ , respectively. As a reference, Pt-loaded  $\text{SiO}_2$  ( $\text{Pt}/\text{SiO}_2$ ) was also prepared by an impregnation method using a  $\text{SiO}_2$  (Aerosil 300,  $300 \pm 30 \text{ m}^2/\text{g}$ ) and aqueous  $\text{H}_2\text{PtCl}_6 \cdot 6\text{H}_2\text{O}$  solution. After an impregnation,  $\text{Pt}/\text{SiO}_2$  was calcined at 773 K for 5 h in air. Prior to the characterization and reaction test,  $\text{Pt}/\text{SiO}_2$  was treated with  $\text{H}_2$  gas (flow rate: 20 ml/min) at 473 K for 1 h.

**Characterization.** The surface area of samples was obtained by measurement of  $\text{N}_2$  adsorption isotherms using a BEL-SORP max (BEL Japan, Inc.) at 77 K after degassing of samples under vacuum at 393 K for 2 h. CO pulse adsorption was carried out to evaluate the Pt surface area and Pt particle size in each sample by using a BEL-METAL-1 instrument (BEL Japan, Inc.) at 323 K. The Pt-loaded  $\text{TiO}_2$  was pre-treated by a  $\text{H}_2$  flow at 323 K for 1 h.

**Catalytic reaction.** In a typical experiment, the decomposition of AB was carried out in a suspension of each sample under inert conditions at 298 K. The fixed amount of sample (10 mg) was placed into a Pyrex reaction vessel under Ar atmosphere. After bubbling of Ar gas, an aqueous AB solution (2 mmol/L, 5 mL) was charged into a Pyrex glass reaction vessel. The amount of  $\text{H}_2$  and  $\text{N}_2$  formed in the gas phase was measured by using a gas chromatograph (Shimadzu GC-8A (Ar-carrier gas) and GC-2014 (He-carrier gas)) equipped with a MS-5A column and TCD detector. UV light irradiation was carried out using a 100 W high-pressure Hg lamp through a water filter (UV light intensity ( $\lambda = 360 \text{ nm}$ ),  $10 \text{ mW}/\text{cm}^2$ ). Photocatalytic reactions were carried out by using the same equipment. The solution of  $\text{H}_3\text{BO}_3$  was prepared by dissolving a  $\text{B}_2\text{O}_3$  in water. The aqueous solution (5 mL) with appropriate concentration of  $\text{NH}_3$  (2 mmol/L),  $(\text{NH}_4)_2\text{SO}_4$  (1 mmol/L) and  $\text{H}_3\text{BO}_3$  (2 mmol/L) was used in the comparative studies. The mixture of aqueous  $\text{NH}_3$  and  $\text{H}_3\text{BO}_3$  was also obtained by mixing a predetermined quantity of them (aqueous  $\text{NH}_3$  and  $\text{H}_3\text{BO}_3$ : 4 mmol/L, 2.5 ml). These chemicals and AB showed no typical light absorption in the wavelength longer than 220 nm.
